# Supplementary material for: The electrochemical sensor based on electrochemical oxidation of nitrite on metalloporphyrin–graphene modified glassy carbon electrode
Source: Royal Society of Chemistry journal article supplement (doi:10.1039/c6ra08269f), 2016-01-01
Supplement: c6ra08269f1.pdf [file c6ra08269f1.pdf]

## Supplementary Material

### The Electrochemical Sensor Based on Electrochemical Oxidation of Nitrite on Metalloporphyrin-Graphene Modified Glassy Carbon Electrode

C. Li<sup>a</sup> B. Guo<sup>b</sup> X. M. Guo<sup>a\*</sup> F. Wang<sup>a</sup>

a) School of Life Science of Technology Institution Harbin Institute of Technology

School of Materials Science and Engineering Institution Harbin Institute of Technology

**Table S1:** Analytical parameters reported for some modified electrodes towards nitrite detection

| Modified electrode                           | Fabrication method | Detection method    | Linear range            | Detection limit                       | Reference |
|----------------------------------------------|--------------------|---------------------|-------------------------|---------------------------------------|-----------|
| PEDOT/Graphene modified electrode            | Immobilize         | Amperometry         | 0.5-240 $\mu\text{M}$   | 0.15 $\mu\text{M}$                    | [1]       |
| Graphene nanoplatelet-protein composite film | Deposition         | Amperometry         | 50 $\mu\text{M}$ -2.5mM | 10 mM                                 | [2]       |
| HAC modified GCE                             | Deposition         | Amperometry and DPV | 1-127 $\mu\text{M}$     | 0.07 $\mu\text{M}$                    | [3]       |
| CR-GO modified GCE                           | Deposition         | Amperometry         | 8.9-167 $\mu\text{M}$   | 1.0 $\mu\text{M}$                     | [4]       |
| CoOx/MWCNTs/GCE                              | Deposition         | Amperometry         | 0.5-250 $\mu\text{M}$   | 0.3 $\mu\text{M}$                     | [5]       |
| GCE/f-ZnO@rFGO                               | Deposition         | Amperometry         | 10 $\mu\text{M}$ -8 mM  | 33 $\mu\text{M}$                      | [6]       |
| GC/GO-Ag nanocomposite                       | Deposition         | Amperometry LSV     | 10-180 $\mu\text{M}$    | 37 $\mu\text{M}$<br>2.1 $\mu\text{M}$ | [7]       |
| GO-MnNH <sub>2</sub> TPP                     | Deposition         | Amperometry         | 10-160 $\mu\text{M}$    | 2.5 $\mu\text{M}$                     | This work |

### References

- 1 Q. Wang and Y. Yun, *Microchim Acta*, 2012, **177**, 411-418.
- 2 L. Cui, X. Meng, M. Xu, K. Shang, S. Ai and Y. Liu, *Electrochim. Acta*, 2011,

**56**, 9769-9774.

- 3 R. Madhu, V. Veeramani and S. Chen, *Sci Rep-UK*, 2014, **4**.
- 4 V. Mani, A. P. Periasamy and S. Chen, *Electrochem. Commun.*, 2012, **17**, 75-78.
- 5 Z. Meng, B. Liu, J. Zheng, Q. Sheng and H. Zhang, *Microchim Acta*, 2011, **175**, 251-257.
- 6 A. Pandikumar, N. Yusoff, N. M. Huang and H. N. Lim, *Microchim Acta*, 2015, **182**, 1113-1122.
- 7 N. I. Ikhsan, P. Rameshkumar, A. Pandikumar, M. M. Shahid, N. M. Huang, S. V. Kumar and H. N. Lim, *Talanta*, 2015, **144**, 908-914.
